# Supplementary material
Source: Royal Society of Chemistry journal article supplement (doi:10.1039/d6qi00643d)
Supplement: d6qi00643d1.pdf [file d6qi00643d1.pdf]

*Supporting information*

**Perfluorinated dibenzoylmethane in Ln<sup>3+</sup> Complexes: Charge-Transfer Quenching and Implications for Luminescence Design**

Alisia V. Tsorieva <sup>a</sup>, Vladislav M. Korshunov <sup>a,b</sup>, Victoria E. Gontcharenko <sup>a,c</sup>, Mikhail T. Metlin <sup>b</sup>, Tatiana S. Stankevich <sup>a,d</sup>, Victor O. Kompanets <sup>e</sup>, Sergey V. Chekalin <sup>e</sup> and Ilya V. Taydakov <sup>a</sup>

<sup>a</sup> P.N. Lebedev Physical Institute of the Russian Academy of Sciences, 53 Leninskiy 1. Prospect, 119991 Moscow, Russia

<sup>b</sup> Bauman Moscow State Technical University, 5/1 2-ya Baumanskaya Str., 105005 Moscow, Russia

<sup>c</sup> Faculty of Chemistry, National Research University Higher School of Economics, 20 Miasnitskaya Street, 101000 Moscow, Russia

<sup>d</sup> N. D. Zelinsky Institute of Organic Chemistry Russian Academy of Sciences, 47 Leninskiy Prospect, 119991 Moscow, Russia

<sup>e</sup> Institute of Spectroscopy of the Russian Academy of Sciences, 5 Fizicheskaya Ul., Moscow, 108840, Russia

\* Corresponding author. E-mail address: [taidakov@gmail.com](mailto:taidakov@gmail.com)

## SI-1. Crystal structures and powder X-ray diffraction (PXRD) data

**Table SI1.** Main crystallographic parameters and refinement details for **1Eu**, **1Gd** and **1Tb**

| <i>Property</i>                              | <b>1Eu</b>                                                                       | <b>1Gd</b>                                                                       | <b>1Tb</b>                                                                       |
|----------------------------------------------|----------------------------------------------------------------------------------|----------------------------------------------------------------------------------|----------------------------------------------------------------------------------|
| CCDC                                         | 2492487                                                                          | 2492489                                                                          | 2492488                                                                          |
| Empirical formula                            | C <sub>57</sub> H <sub>11</sub> F <sub>30</sub> N <sub>2</sub> O <sub>6</sub> Eu | C <sub>57</sub> H <sub>11</sub> F <sub>30</sub> N <sub>2</sub> O <sub>6</sub> Gd | C <sub>57</sub> H <sub>11</sub> F <sub>30</sub> N <sub>2</sub> O <sub>6</sub> Tb |
| Formula weight (g·mol <sup>-1</sup> )        | 1541.64                                                                          | 1546.93                                                                          | 1548.60                                                                          |
| T (K)                                        | 100(2)                                                                           | 100(2)                                                                           | 100(2)                                                                           |
| Crystal system                               | triclinic                                                                        | triclinic                                                                        | triclinic                                                                        |
| Space group                                  | P -1                                                                             | P -1                                                                             | P -1                                                                             |
| a (Å)                                        | 11.9675(4)                                                                       | 11.9449(3)                                                                       | 11.9117(3)                                                                       |
| b (Å)                                        | 13.2543(4)                                                                       | 13.2468(3)                                                                       | 13.2793(4)                                                                       |
| c (Å)                                        | 17.6498(5)                                                                       | 17.6143(5)                                                                       | 17.5854(4)                                                                       |
| α (deg)                                      | 82.5870(10)                                                                      | 82.6380(10)                                                                      | 82.5660(10)                                                                      |
| β (deg)                                      | 71.3540(10)                                                                      | 71.4250(10)                                                                      | 71.5970(10)                                                                      |
| γ (deg)                                      | 85.1860(10)                                                                      | 85.2550(10)                                                                      | 85.1880(10)                                                                      |
| V (Å <sup>3</sup> )                          | 2627.79(14)                                                                      | 2617.57(12)                                                                      | 2614.46(12)                                                                      |
| Z                                            | 2                                                                                | 2                                                                                | 2                                                                                |
| D <sub>calc</sub> (g·cm <sup>-3</sup> )      | 1.948                                                                            | 1.963                                                                            | 1.967                                                                            |
| θ <sub>min</sub> -θ <sub>max</sub> (deg)     | 1.798 - 30.505                                                                   | 1.552 - 30.548                                                                   | 1.548 - 29.000                                                                   |
| μ (mm <sup>-1</sup> )                        | 1.358                                                                            | 1.432                                                                            | 1.518                                                                            |
| T <sub>min</sub> /T <sub>max</sub>           | 0.5816/0.6478                                                                    | 0.5508/0.6478                                                                    | 0.5625/0.6478                                                                    |
| Reflections/Unique                           | 29540/15863                                                                      | 29683/15890                                                                      | 26529/13790                                                                      |
| Reflections with I>2σ(I)                     | 14369                                                                            | 13252                                                                            | 11418                                                                            |
| R <sub>int</sub>                             | 0.0263                                                                           | 0.0425                                                                           | 0.0453                                                                           |
| Goof                                         | 1.012                                                                            | 1.030                                                                            | 1.010                                                                            |
| R <sub>1</sub> , wR <sub>2</sub> (I > 2σ(I)) | 0.0264, 0.0555                                                                   | 0.0409, 0.0802                                                                   | 0.0393, 0.0780                                                                   |
| R <sub>1</sub> , wR <sub>2</sub> (all data)  | 0.0315, 0.0572                                                                   | 0.0545, 0.0847                                                                   | 0.0538, 0.0828                                                                   |

**Table SI2.** Shape analysis of Ln<sup>3+</sup> coordination polyhedra in **1Eu**, **1Gd**, **1Tb**

| Compound   | Cube<br>(O <sub>h</sub> ) | Square<br>antiprism<br>(D <sub>4d</sub> ) | Triangular<br>dodecahedron<br>(D <sub>2d</sub> ) | Biaugmented<br>trigonal prism<br>(C <sub>2v</sub> ) | Triakis<br>tetrahedron<br>(T <sub>d</sub> ) |
|------------|---------------------------|-------------------------------------------|--------------------------------------------------|-----------------------------------------------------|---------------------------------------------|
| <b>1Eu</b> | 10.143                    | <b>1.271</b>                              | 1.081                                            | 2.074                                               | 10.802                                      |
| <b>1Gd</b> | 10.128                    | <b>1.274</b>                              | 1.088                                            | 2.079                                               | 10.782                                      |
| <b>1Tb</b> | 10.180                    | <b>1.213</b>                              | 1.095                                            | 2.017                                               | 10.836                                      |

**Table SI3.** Ln-O bond lengths in corresponding complexes.

| Ln-O bond length, Å | <b>1Eu</b> | <b>1Gd</b> | <b>1Tb</b> |
|---------------------|------------|------------|------------|
| Ln-O1               | 2.3329(12) | 2.3303(19) | 2.315(4)   |
| Ln-O2               | 2.3837(12) | 2.3782(18) | 2.359(2)   |
| Ln-O3               | 2.3076(12) | 2.3072(19) | 2.287(2)   |

|           |            |            |          |
|-----------|------------|------------|----------|
| Ln-O4     | 2.3820(12) | 2.3803(18) | 2.371(2) |
| Ln-O5     | 2.3601(12) | 2.3538(19) | 2.338(2) |
| Ln-O6     | 2.3998(12) | 2.3949(18) | 2.388(2) |
| Ln-N1     | 2.5389(14) | 2.532(2)   | 2.526(2) |
| Ln-N2     | 2.6127(14) | 2.611(2)   | 2.595(2) |
| Mean Ln-O | 2.36       | 2.35       | 2.34     |
| Mean Ln-N | 2.58       | 2.57       | 2.56     |

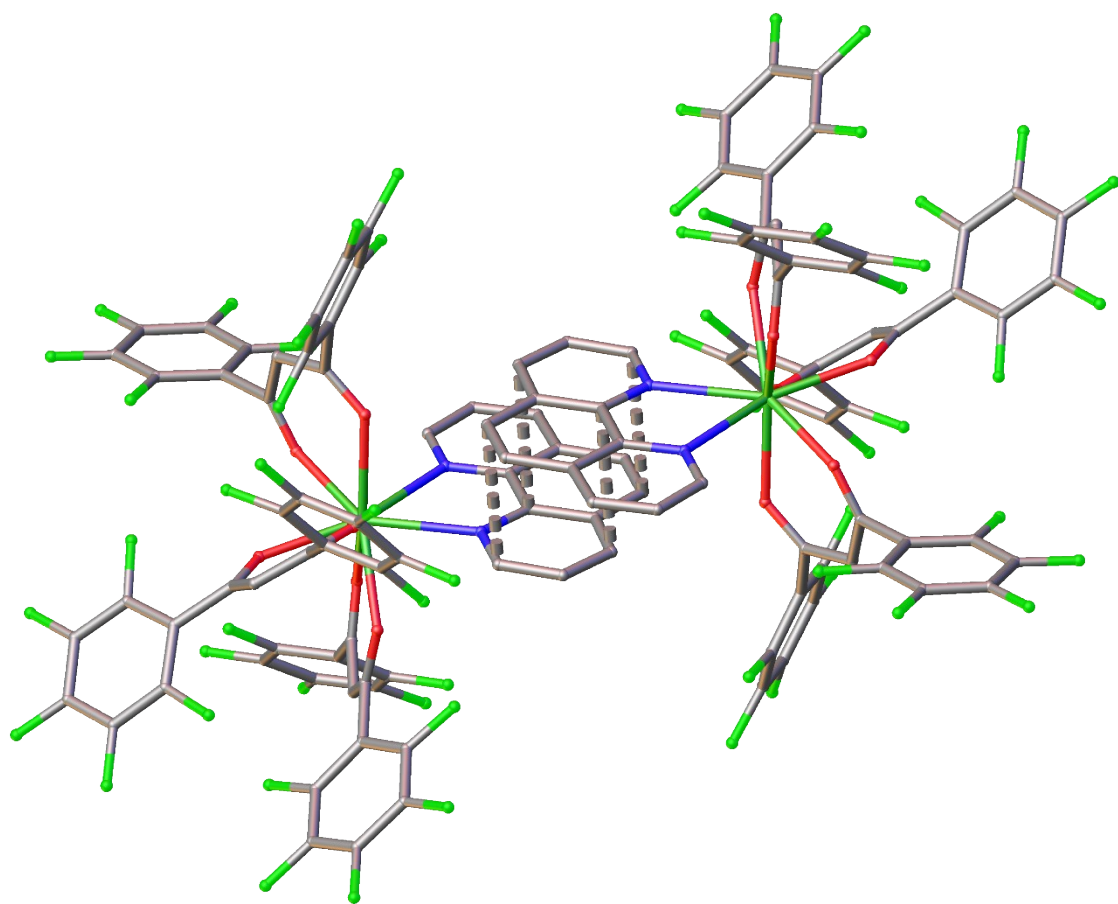

**Figure S11.**  $\pi$ -stacking (shown in dashed lines) between 1,10-phenanthroline moieties in **1Gd**. Thermal ellipsoids of atomic displacement, as well as hydrogen atoms, are omitted for clarity. The second molecule corresponds to symmetry code  $(1-x, 2-y, -z)$ .

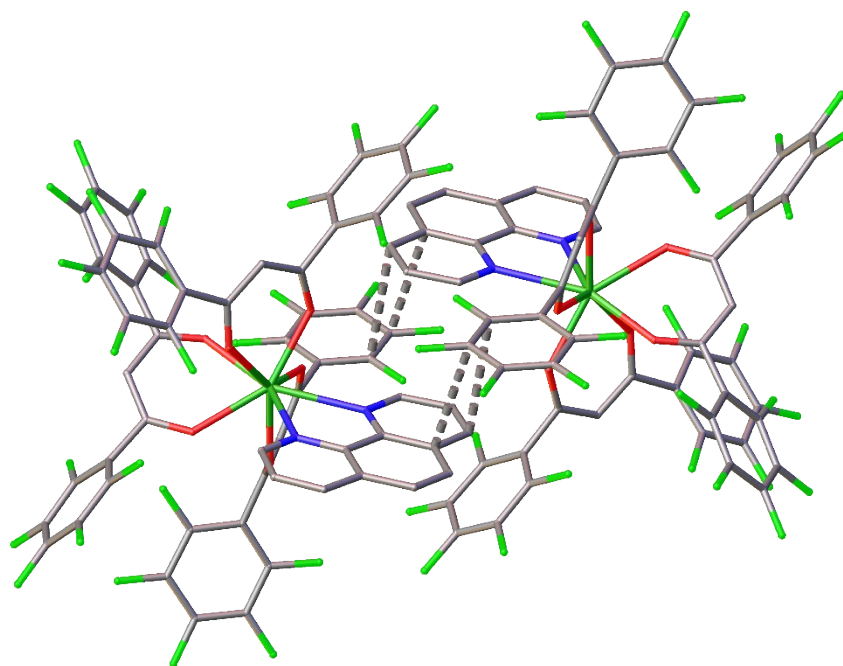

**Figure S12.**  $\pi$ -stacking (shown in dashed lines) between 1,10-phenanthroline and perfluorophenyl moieties in **1Gd**. Thermal ellipsoids of atomic displacement, as well as hydrogen atoms, are omitted for clarity. The second molecule corresponds to symmetry code ( $1-x, 1-y, -z$ ).

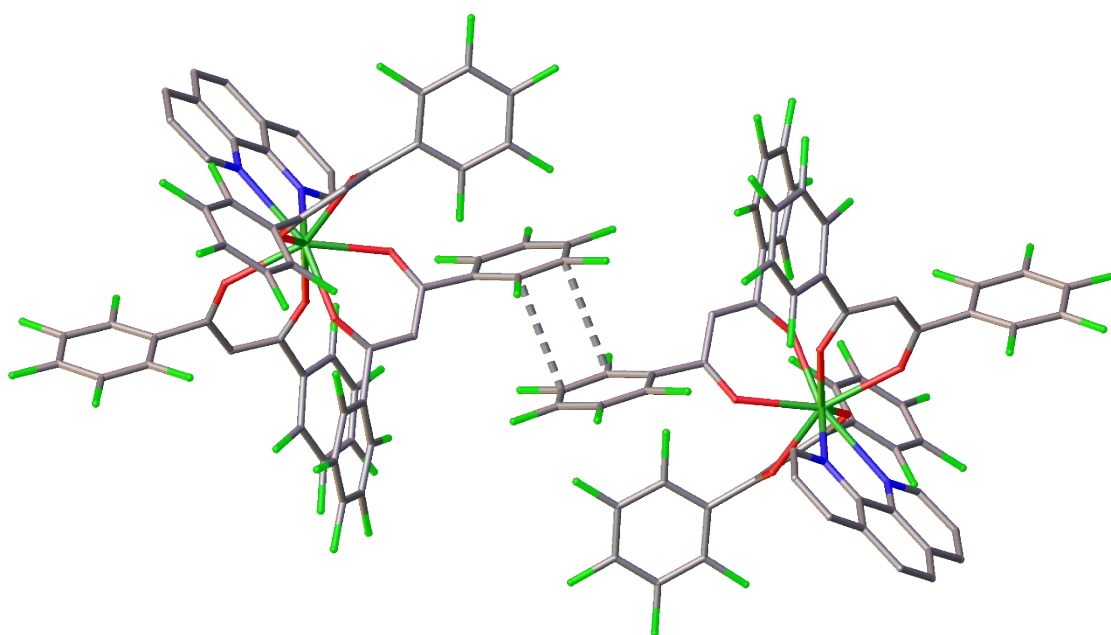

**Figure S13.**  $\pi$ -stacking (shown in dashed lines) between perfluorophenyl moieties in **1Gd**. Thermal ellipsoids of atomic displacement, as well as hydrogen atoms, are omitted for clarity. The second molecule corresponds to symmetry code ( $1-x, 2-y, 1-z$ ).

## SI-2. Photophysical studies

The UV-Vis spectra for MeCN dissolved **1Eu**, **1Tb** complexes and free ligand **HPFDBM** are shown in Figure S1. The absorption band located at ca. 350 nm is associated with electronic  $\pi$ - $\pi^*$

transitions of  $\beta$ -diketone fragment.<sup>1</sup> The peaks at 270 and 293 nm correspond to *1,10*-phenanthroline.

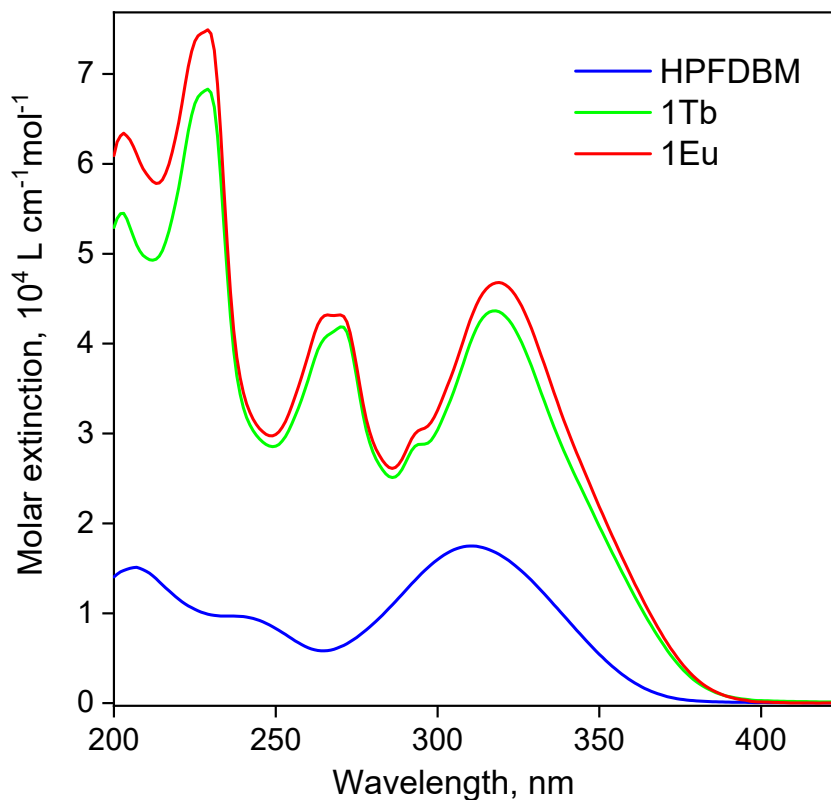

**Figure SI4.** UV-vis spectra for the investigated **1Tb** and **1Eu** complexes and free ligand dissolved in MeCN

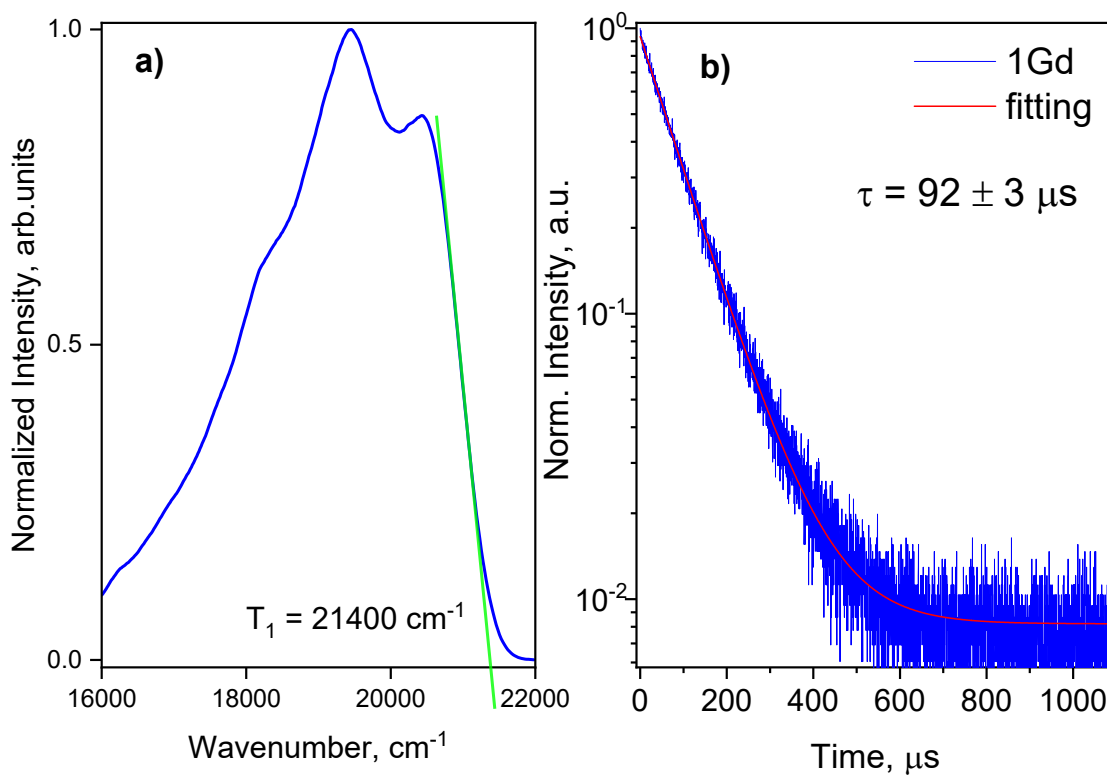

**Figure SI5. a)** The phosphorescence spectra for solid state **1Gd** compound normalized on the maximum intensity recorded upon excitation at 350 nm at 77 K with 10  $\mu$ s time delay; **b)** PL decay for **1Gd** measured upon excitation at 360 nm recorded at 520 nm at 300 K

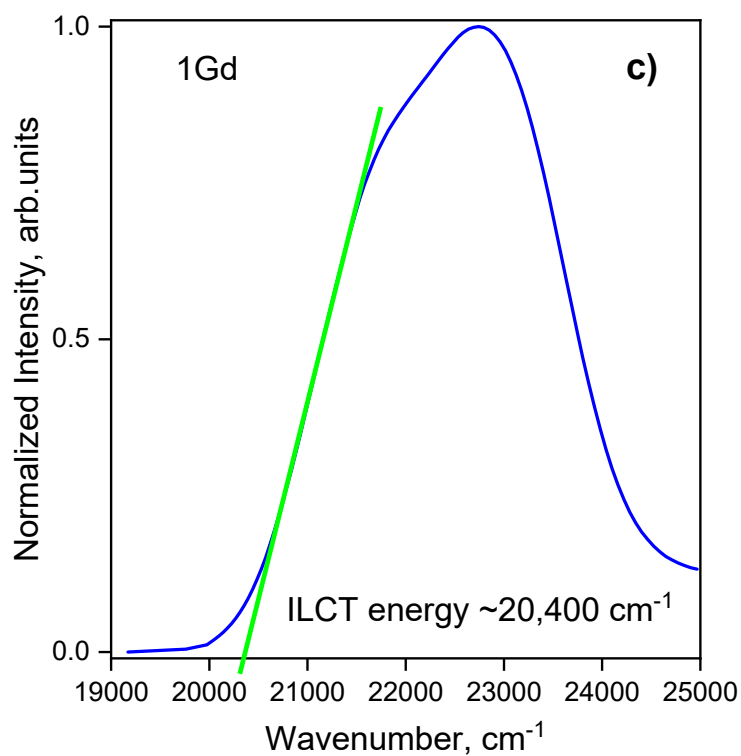

**Figure SI5. c)** Visualization of tangent method applied to the excitation spectrum of **1Gd** compound.

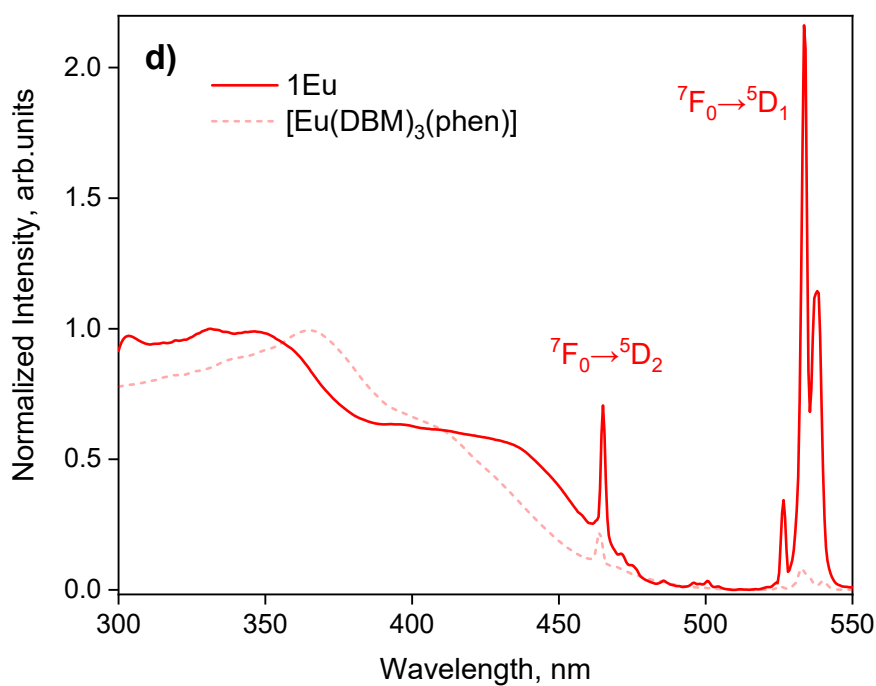

**Figure S15.** d) PL excitation spectra for crystalline powder complexes recorded at 615 nm for **1Eu** and **[Eu(DBM)<sub>3</sub>(phen)]** normalized on maximum PL ligand intensity

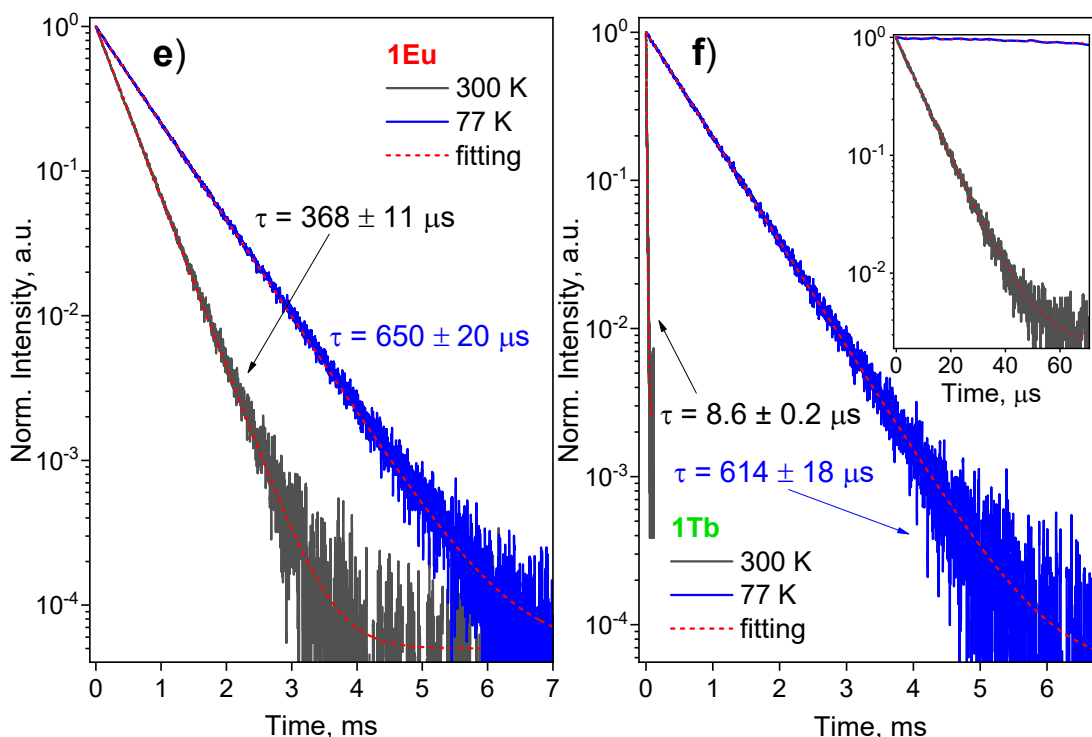

**Figure S15.** e) PL decay for **1Eu** measured upon excitation at 360 nm recorded at 615 nm at 300 K; f) PL decay for **1Tb** measured upon excitation at 360 nm recorded at 520 nm at 300 K. In the simplest case, the relaxation of excited states explained by a two-level model (relaxation of strictly one excited state). It obeys a monoexponential law

$$I(t) = I_0 e^{-\frac{t}{\tau_{obs}}},$$

where the lifetime  $\tau_{obs}$  observed in the experiment is defined as

$$\tau_{obs} = \frac{1}{k_{obs}} = \frac{1}{k_{rad} + k_{nrad}},$$

$k_{rad}$  and  $k_{nrad}$  – the rate constants of radiative and nonradiative relaxation, respectively.

The value of the internal quantum yield can be estimated by the following formula

$$\Phi_{Ln} = \frac{k_{rad}}{k_{rad} + k_{nrad}}.$$

Since the value of the rate constant of the magnetic-dipole transition  ${}^5D_0-{}^7F_1$  in  $\text{Eu}^{3+}$   $k_{MD}=14.65 \text{ s}^{-1}$  does not depend on the electric field induced by the ligand, it is possible to determine the value of  $k_{rad}$  by the relation

$$k_{rad} = k_{MD} n^3 \frac{I_{tot}}{I_{MD}},$$

where  $n$  – the refractive index,  $I_{tot}/I_{MD}$  – the ratio of the total integral luminescence intensity to the integral intensity of the magnetic-dipole transition. The constant  $k_{nrad}$  was evaluated using a simple dependency

$$k_{nrad} = \frac{1}{\tau_{obs}} - k_{rad},$$

including the calculated  $k_{rad}$  and the observed attenuation time  $\tau_{obs}$ , measured with resonant excitation of  $\text{Eu}^{3+}$  at the wavelength 532 nm. The calculated value of the internal PL quantum yield  $\Phi_{Ln}$ , the value of the total PL quantum yield  $\Phi$  measured by the absolute method, the sensitization coefficient  $\eta$  are presented in Table SI4.

**Table SI4.** Photophysical parameters for crystalline powder complexes:  $k_{rad}$  and  $k_{nrad}$  – radiative and non-radiative processes rates, the back energy transfer (BET) process rate ( $k_{BET}$ ), the internal quantum yield ( $\Phi_{Ln}$ ), the overall quantum yield ( $\Phi$ ) and the sensitization efficiency  $\eta$ .

| Compound                            | $I_{tot}/I_{MD}$ | $k_{rad}, \text{ s}^{-1}$ | $k_{nrad}, \text{ s}^{-1}$ | $k_{BET}, \text{ s}^{-1}$ | $k_{vib}, \text{ s}^{-1}$ | $\tau_{obs}^{-1}, \text{ s}^{-1}$ | $\Phi_{Ln}, \%$ | $\Phi, \%$ | $\eta$ |
|-------------------------------------|------------------|---------------------------|----------------------------|---------------------------|---------------------------|-----------------------------------|-----------------|------------|--------|
| <b>[Eu(DBM)<sub>3</sub>(phen)]*</b> | 25.5             | 1,262                     | 1,288                      | 407                       | 881                       | 2,550                             | 49.5            | 23.3       | 0.47   |
| <b>1Eu</b>                          | 20.0             | 989                       | 1,814                      | 554                       | 1,260                     | 2,803                             | 35.3            | 2.0        | 0.014  |

\* The results except  $k_{BET}$  and  $k_{vib}$  are obtained in the work<sup>2</sup>

The Arrhenius equation is given by

$$\ln\left(\frac{1}{\tau_{300}} - \frac{1}{\tau_T}\right) = \ln(k_{BET}) = \ln(A) - \frac{\Delta E_A}{R} T^{-1},$$

where  $\tau_{300}$ ,  $\tau_T$ ,  $R$  and  $T$  are an emission lifetime at 300 K, emission lifetime at  $T$  temperature, gas constant and compound temperature, respectively.<sup>3</sup>

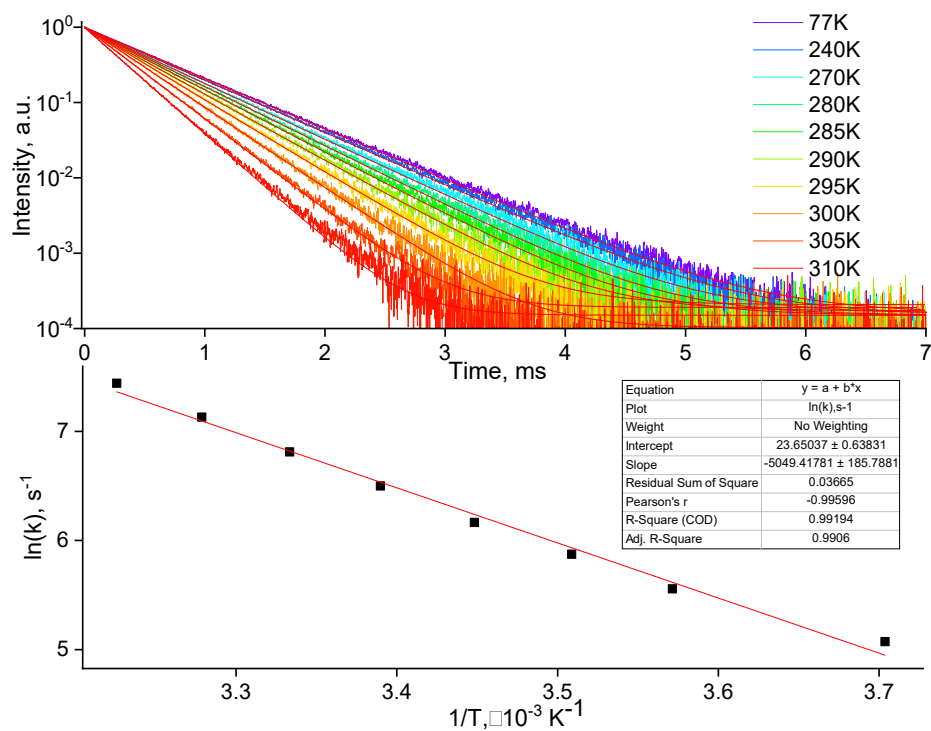

**Figure SI6.** Temperature-dependent emission decays for **1Eu** compound in solid state at temperatures of 78-300 K under pulsed excitation at 360 nm.

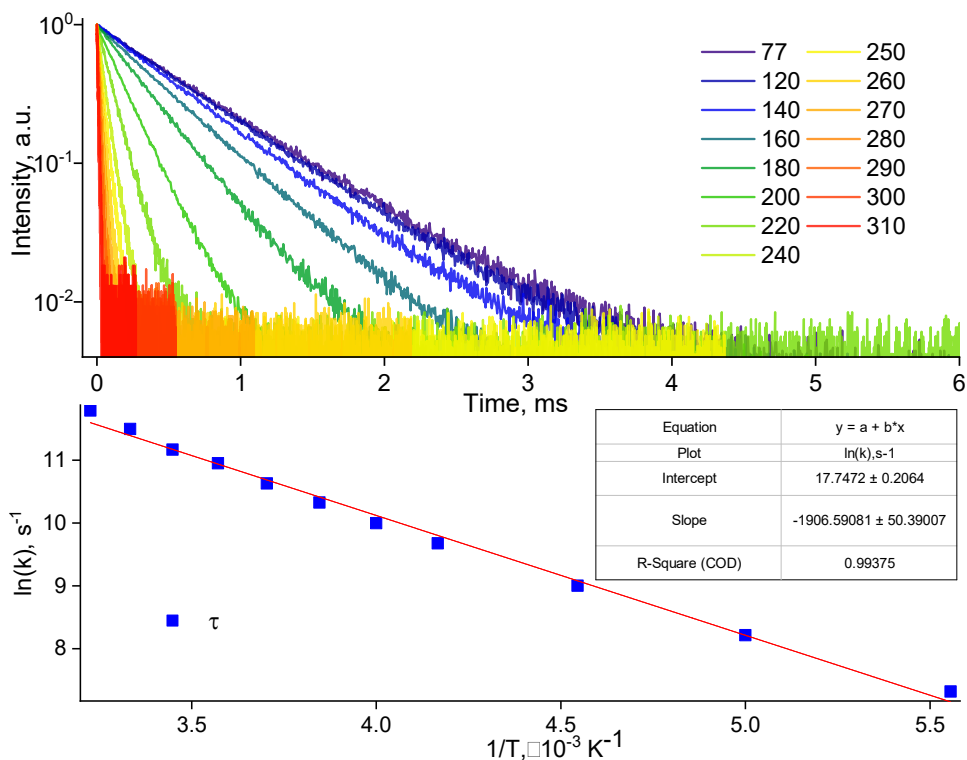

**Figure SI7.** Temperature-dependent emission decays for **1Tb** compound in solid state at temperatures of 78-300 K under pulsed excitation at 360 nm.

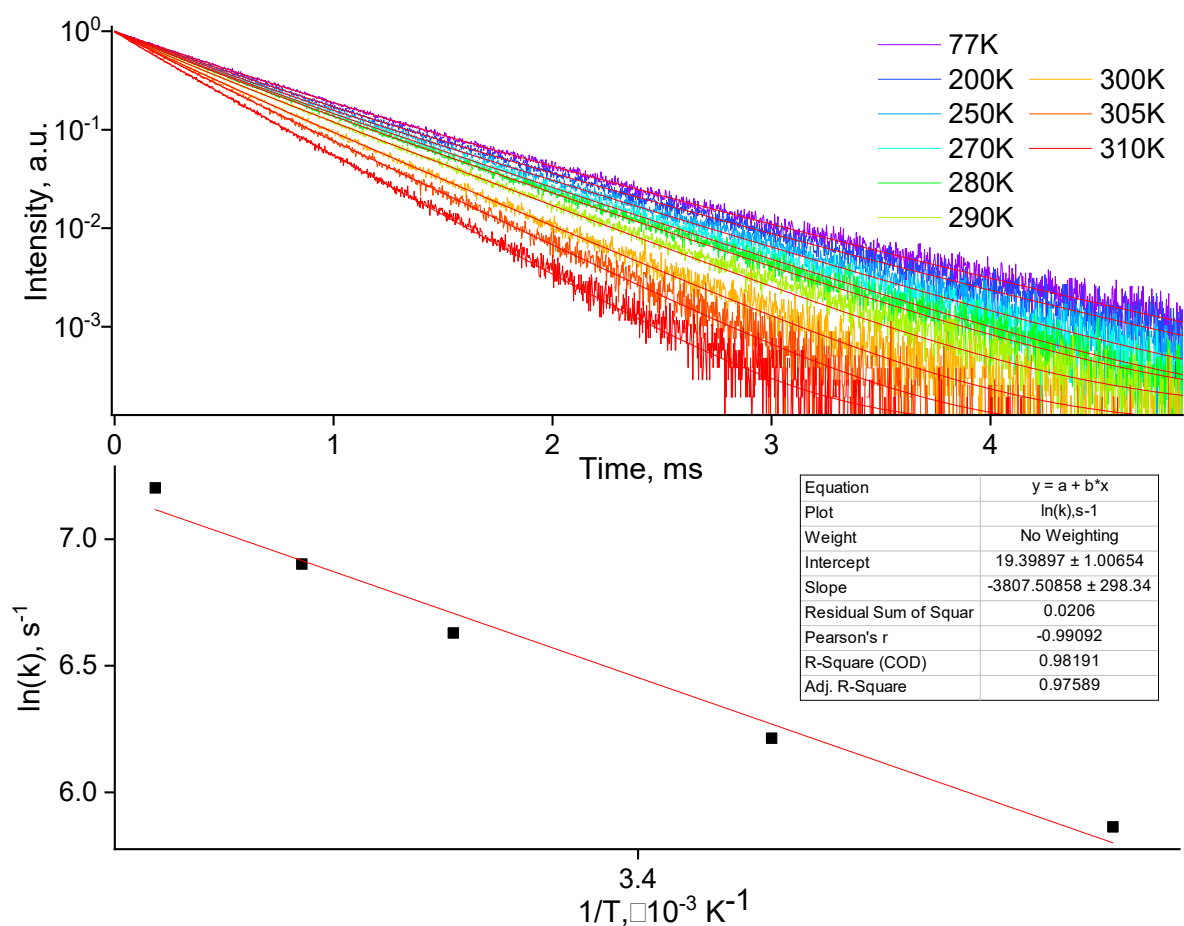

**Figure S18.** Temperature-dependent emission decays for **[Eu(DBM)<sub>3</sub>(phen)]** compound in solid state at temperatures of 78-300 K under pulsed excitation at 360 nm.

**Table S15.** The luminescence lifetimes ( $\tau$ ) estimated from temperature-dependent luminescence decays for the **[Eu(DBM)<sub>3</sub>(phen)]**, **1Eu** and **1Tb** compounds.

| <b>[Eu(DBM)<sub>3</sub>(phen)]</b> |                  | <b>1Eu</b> |                  | <b>1Tb</b> |                  |
|------------------------------------|------------------|------------|------------------|------------|------------------|
| T, K                               | $\tau$ , $\mu$ s | T, K       | $\tau$ , $\mu$ s | T, K       | $\tau$ , $\mu$ s |
| 78                                 | 653              | 78         | 644              | 78         | 646              |
| 200                                | 617              | 200        | 439              | 140        | 554              |
| 250                                | 578              | 250        | 339              | 160        | 457              |
| 270                                | 551              | 270        | 584              | 180        | 327.2            |
| 280                                | 531              | 280        | 552              | 200        | 190.8            |
| 290                                | 492              | 285        | 524              | 220        | 103.4            |
| 300                                | 437              | 290        | 493              | 240        | 57.1             |
| 305                                | 397              | 295        | 451              | 250        | 42.5             |
| 310                                | 348              | 300        | 406.5            | 260        | 31.2             |
|                                    |                  | 305        | 357              | 270        | 23.3             |

|  |  |     |     |     |      |
|--|--|-----|-----|-----|------|
|  |  | 310 | 307 | 280 | 17,1 |
|  |  |     |     | 290 | 13,8 |
|  |  |     |     | 300 | 10   |
|  |  |     |     | 310 | 7,5  |

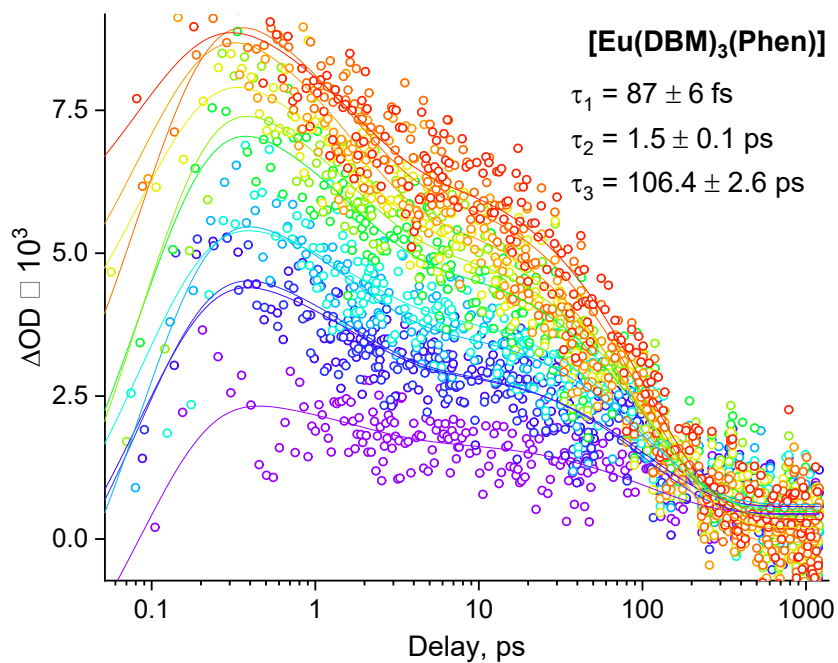

**Figure SI9.** Fs-TA kinetics for [Eu(DBM)<sub>3</sub>(phen)] at selected wavelengths.

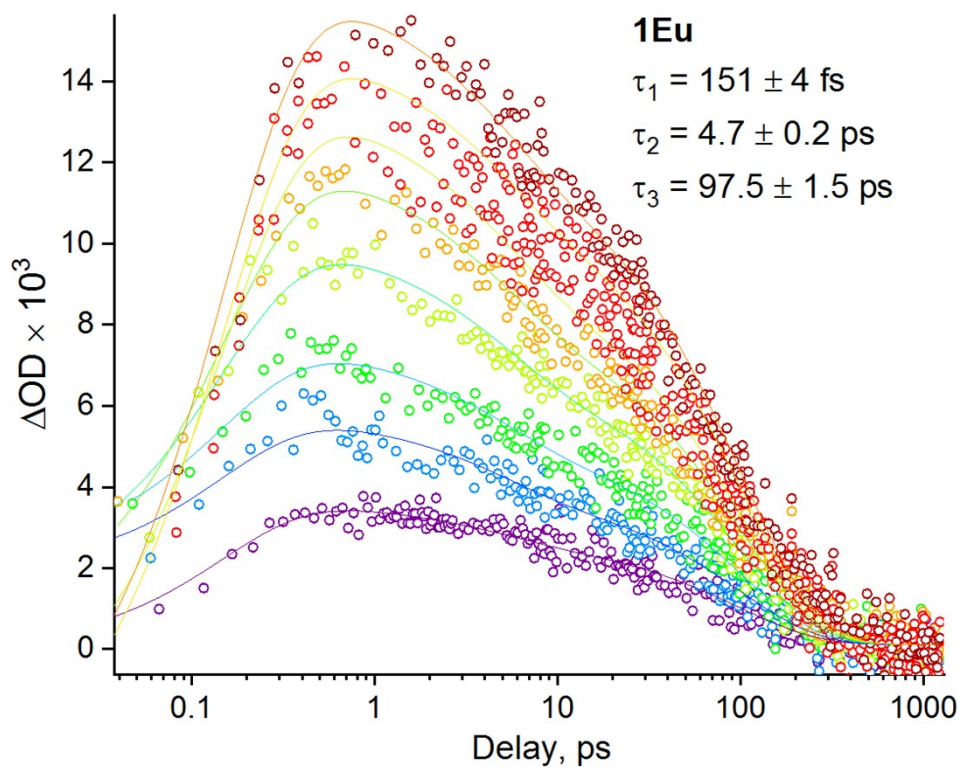

**Figure SI10.** Fs-TA kinetics for 1Eu at selected wavelengths.

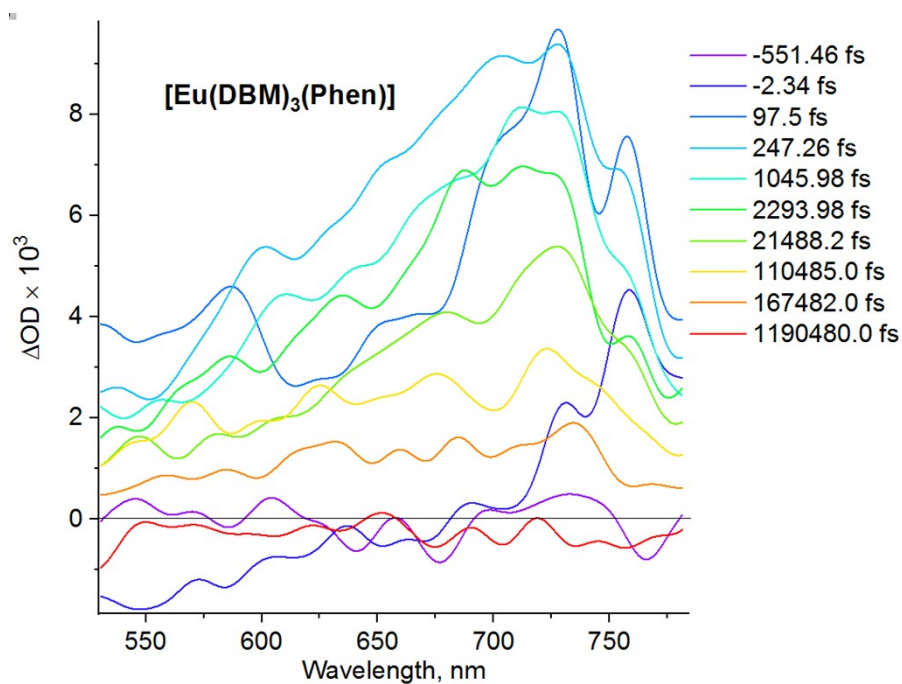

**Figure S111.** Fs-TA kinetics for  $[\text{Eu}(\text{DBM})_3(\text{phen})]$  for selected time delays.

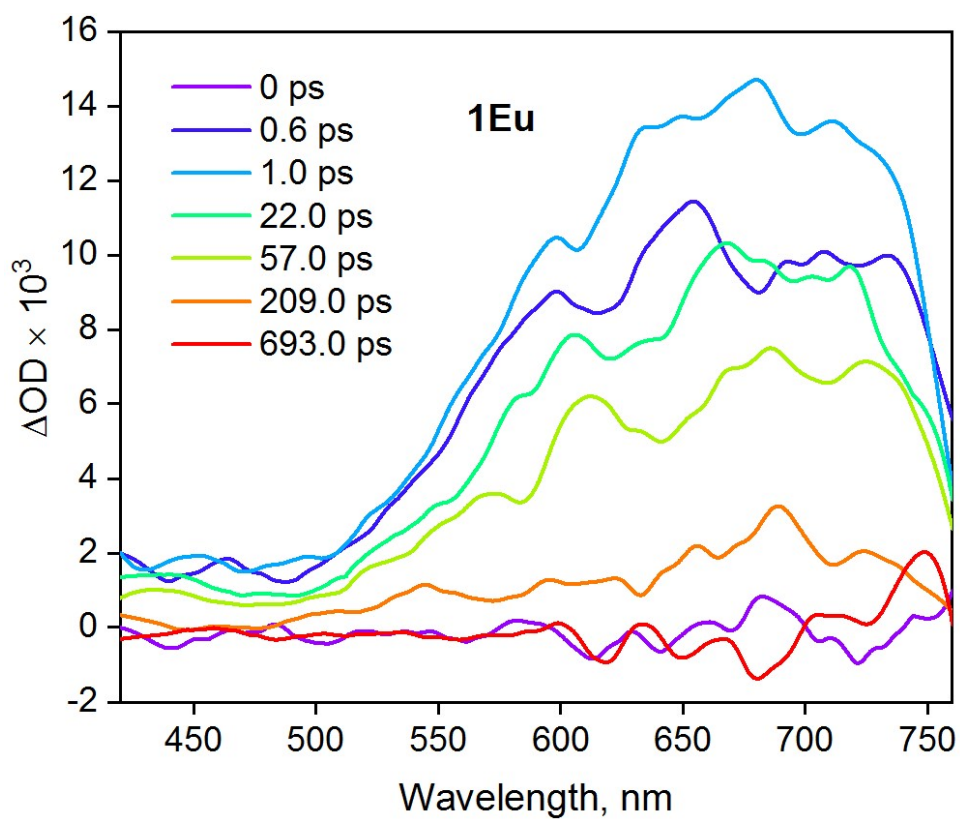

**Figure S112.** Fs-TA kinetics for  $1\text{Eu}$  for selected time delays.

### SI-3. Synthesis and characterization of ligand HPFDBM.

Column chromatography was performed on Silica gel 60 (50-200  $\mu\text{m}$  particle size) sorbents, both obtained from Macherey-Nagel.

$^1\text{H}$ ,  $^{19}\text{F}$  and  $^{13}\text{C}$  NMR spectra were obtained with a Bruker AM-300 or DRX-500 NMR spectrometer (at frequencies of 300.1/500.13, 282.4/470.1 and 75.5/125.76 MHz, respectively) in  $\text{CDCl}_3$  solutions, with TMS ( $^1\text{H}$ ,  $^{13}\text{C}$ ) or  $\text{CFCl}_3$  ( $^{19}\text{F}$ ) as a standards.  $J$  values are given in Hz. Multiplicities are assigned as s (singlet), d (doublet), t (triplet), q (quartet) and m (multiplet). High resolution mass spectra were measured on a Bruker micrOTOF II instrument using electrospray ionization (ESI). IR spectra were measured with a Bruker Alpha instrument in KBr pellets.

We were unable to obtain spectra of acceptable quality in  $\text{CD}_3\text{CN}$  or  $\text{CD}_3\text{OD}$  due to low solubility of complexes. Solubility in  $\text{CDCl}_3$  is incomparably higher; we were able to dissolve up to 25–30 mg of the complex in 1 mL, but it is evident that in this solvent the complexes are unstable and partially decompose. In our view, NMR spectra of complexes are of limited informative value; however, as one of the reviewers requested that they must be included in the paper, they have been added to the SI section.

#### **1,3-Bs(perfluorophenyl)propane-1,3-dione (HPFDBM).**<sup>4,5</sup>

Anhydrous  $\text{AlCl}_3$  (5.3 g, 40 mmol) was suspended in 30 mL of dry 1,1,2,2-tetrachloroethane and the 2,3,4,5,6-pentafluorobenzoyl chloride (5.8 mL, 9.2 g 40 mmol) is added dropwise within 10 min, while the mixture was protected from moisture by  $\text{CaCl}_2$  drying tube. The resulted solution was stirred for 1 h at a room temperature (22  $^\circ\text{C}$ ) and then vinyl acetate (3.8 mL, 3.45 g, 40 mmol) was added dropwise. Dark reaction mixture was stirred overnight at 30  $^\circ\text{C}$ , then carefully poured with stirring on mixture of ice (100 g) and 20 mL of conc. HCl. The solvent was evaporated, and residue separated by a column chromatography (silica,  $\text{C}_6\text{H}_6$ ). The diketone was obtained at  $R_f = 0.75$ , and two other byproducts were

obtained with  $R_f = 0.9$  ( $\text{Al}(\text{PFDBM})_3$ ) and 0.45 (1-(perfluorophenyl)butane-1,3-dione), respectively. The target compound was collected and recrystallized from 96% EtOH. Yield is 13 % (2.1 g). M. p. 82-83 °C (lit<sup>5</sup>. 83–84 °C).

$^1\text{H}$  NMR (300 MHz,  $\text{CDCl}_3$ , 100% enol form):  $\delta$  15.11 (s, OH), 6.25 (s, CH).

$^{13}\text{C}$  NMR (126 MHz,  $\text{CDCl}_3$ ):  $\delta$  176.4, 145.4 (d(m),  $J = 256$  Hz), 143.3 (d(m),  $J = 256$  Hz), 136.4 (d(m),  $J = 256$  Hz), 110.7 (m), 105.8 (s).

$^{19}\text{F}$  NMR (282MHz,  $\text{CDCl}_3$ ):  $\delta$  -135.6 – (-142.3) (m), -147.7 (tt,  $J = 20.9, 4.5$  Hz), -156.8 – (-164.4) (m).

IR (KBr pellet,  $\text{cm}^{-1}$ ): 3461, 3142, 2921, 1655 1590, 1519, 1489, 1330, 1322, 1212, 1183, 1100, 990, 936, 823, 648.

HRMS (EI)  $m/z$ :  $[\text{M}+1]^+$  Calcd for  $\text{C}_{15}\text{H}_2\text{F}_{10}\text{O}_2 + \text{H}$ : 404.9968; Found: 404.9963

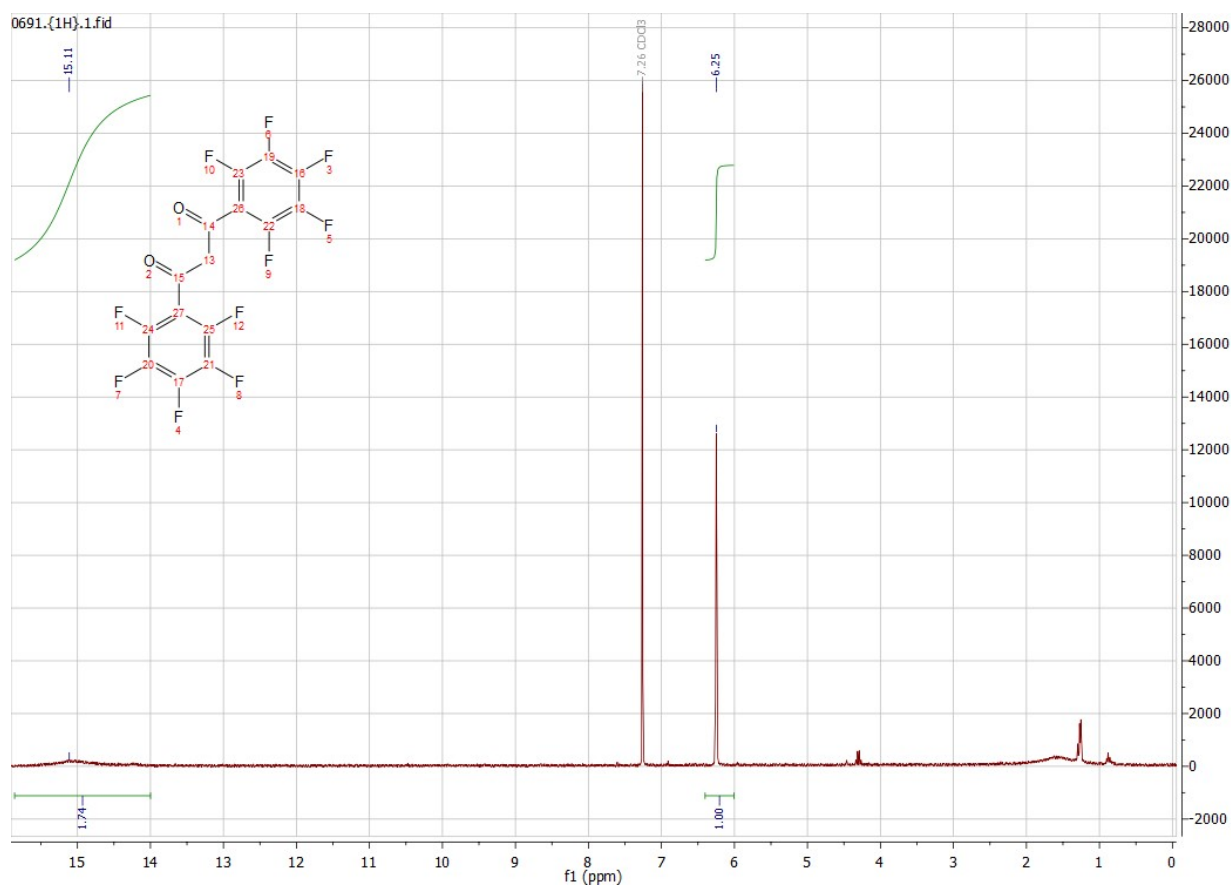

**Figure SI13.**  $^1\text{H}$ -NMR spectrum for HPFDBM in  $\text{CDCl}_3$

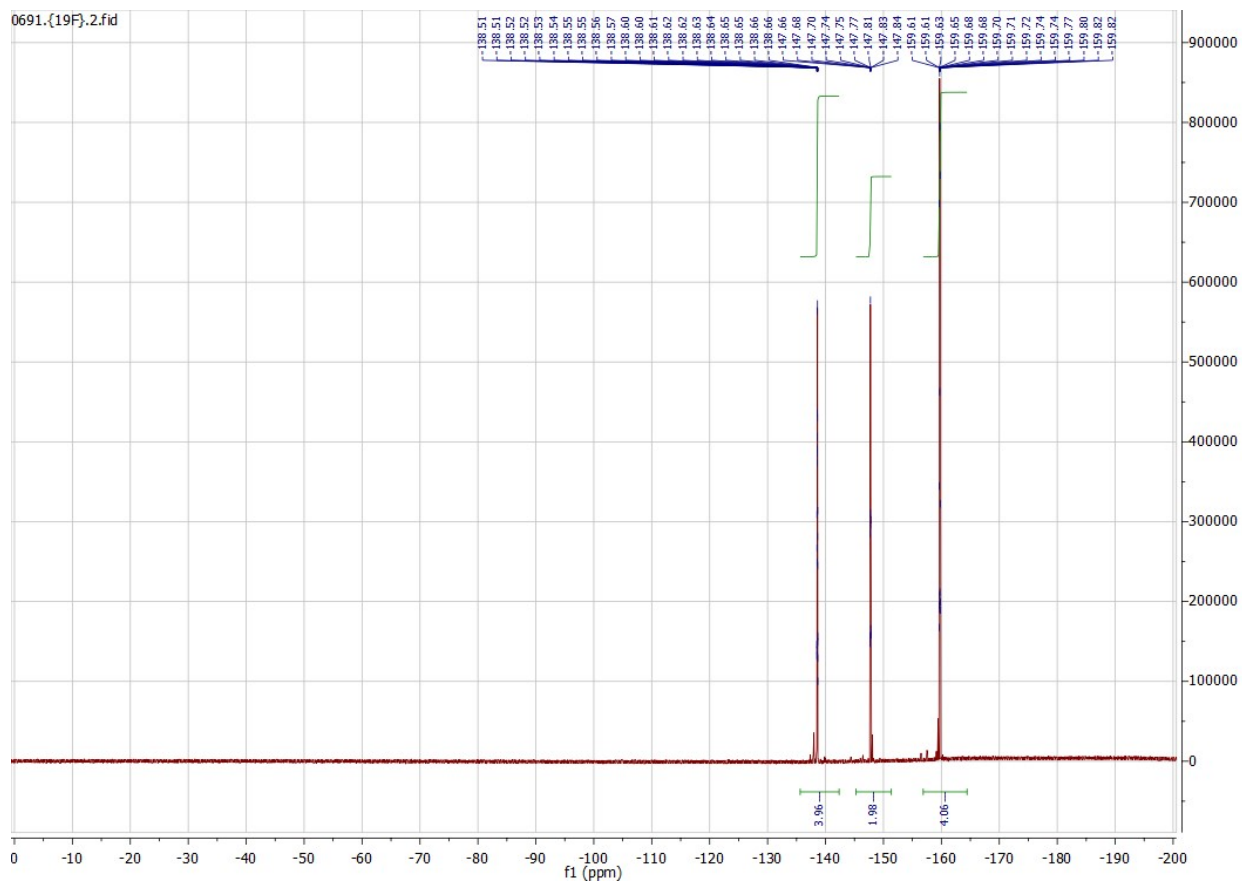

Figure S114.  $^{19}\text{F}$ -NMR spectrum for HPFDBM in  $\text{CDCl}_3$

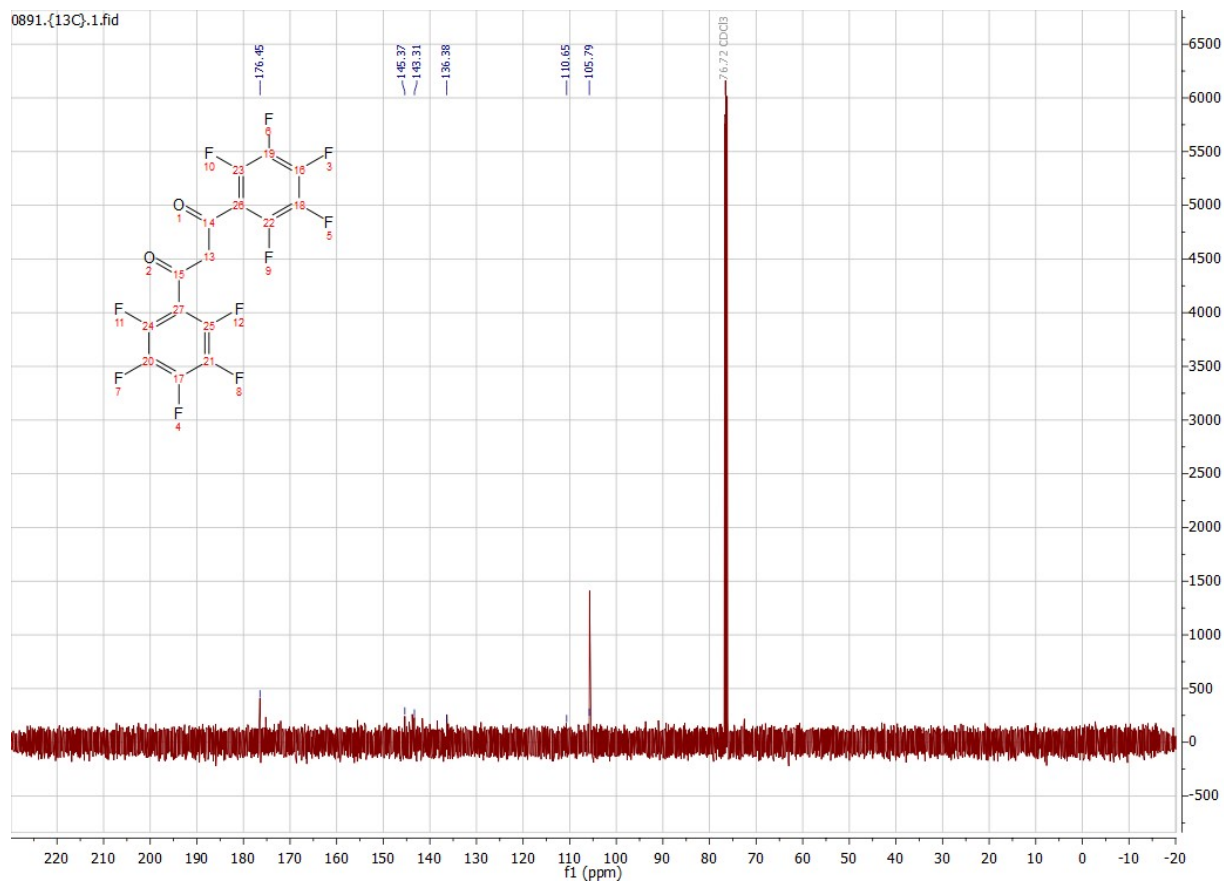

Figure S115.  $^{13}\text{C}$ -NMR spectrum for HPFDBM in  $\text{CDCl}_3$

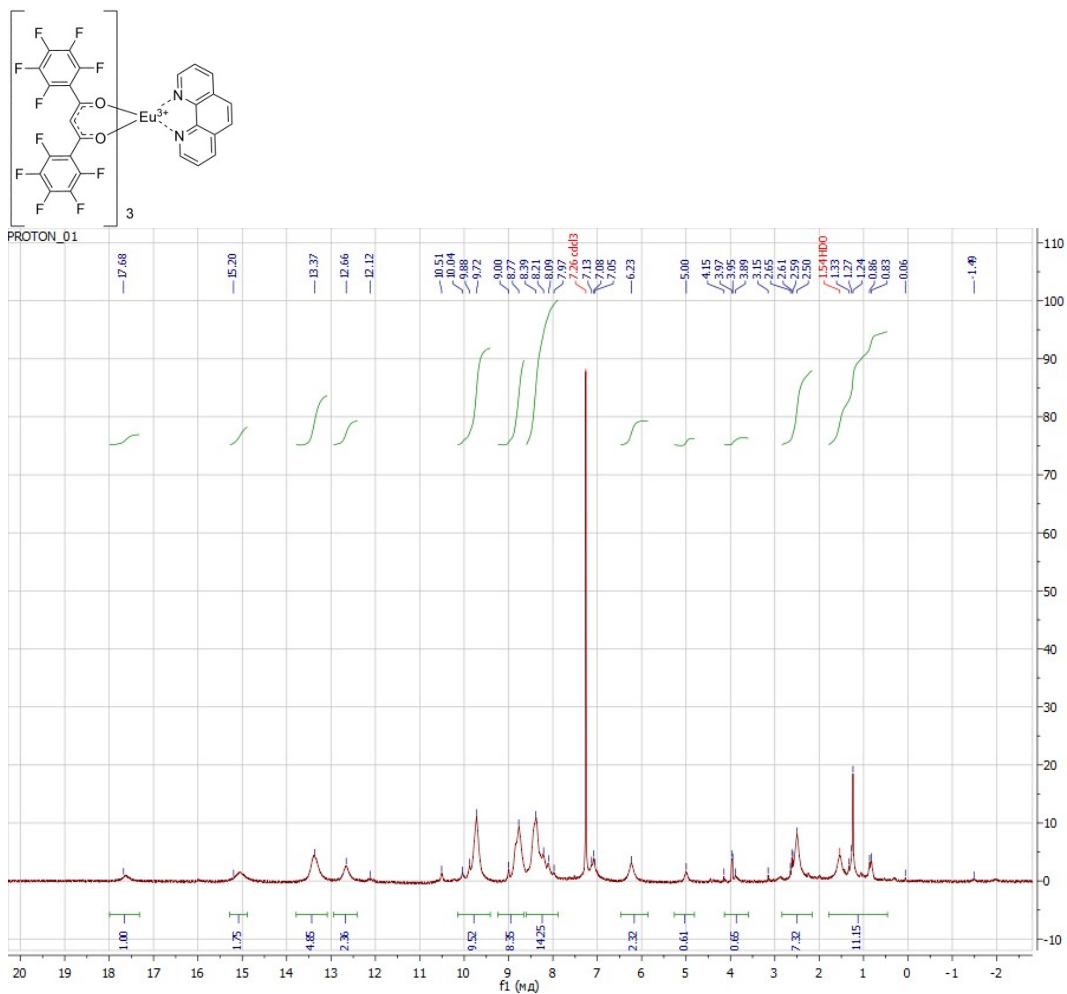

Figure SI16.  $^1H$ -NMR spectrum of  $[Eu(PFDMB)_3Phen]$  in  $CDCl_3$

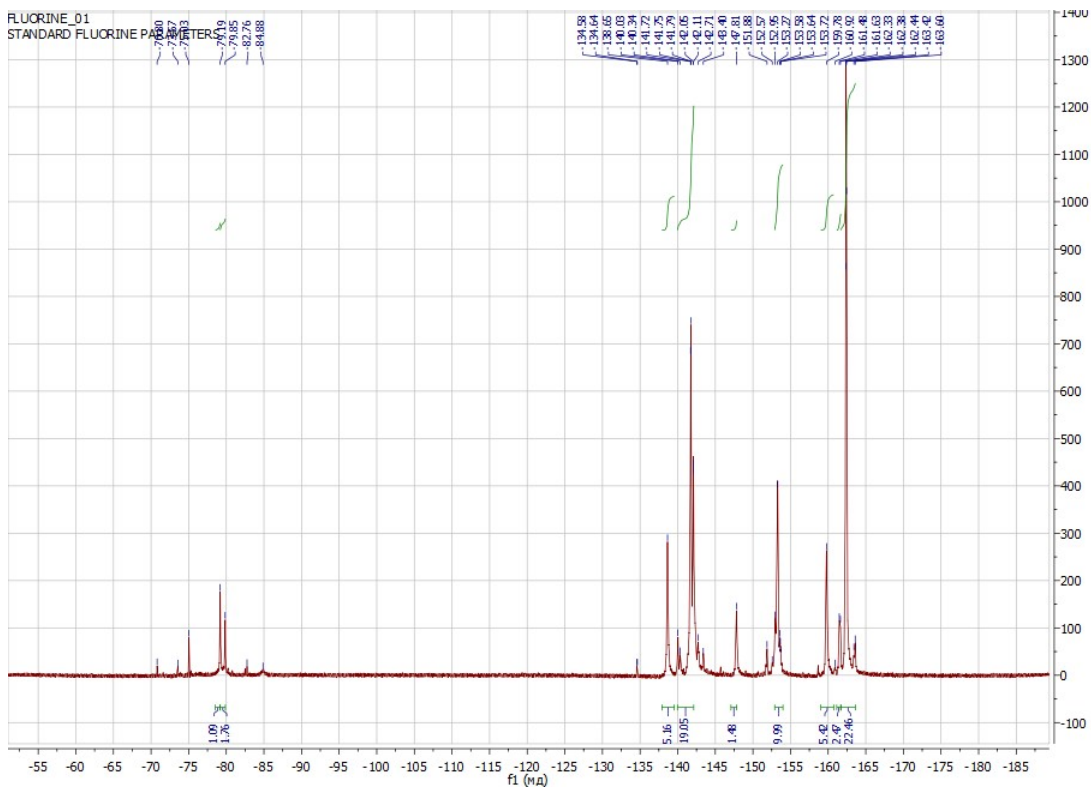

Figure SI17.  $^{19}F$ -NMR spectrum of  $[Eu(PFDMB)_3Phen]$  in  $CDCl_3$

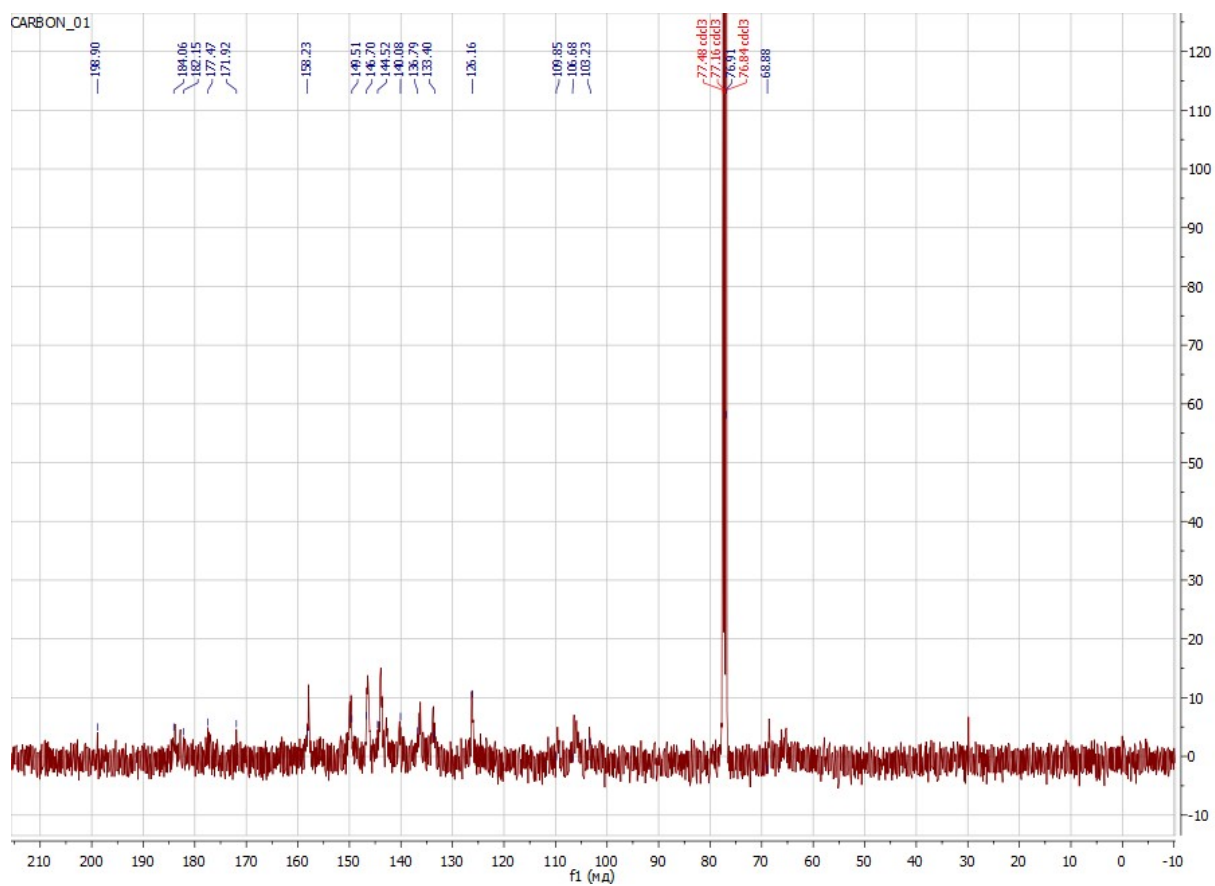

Figure S118.  $^{13}\text{C}$ - NMR spectrum of  $[\text{Eu}(\text{PFDMB})_3\text{Phen}]$  in  $\text{CDCl}_3$

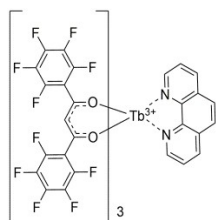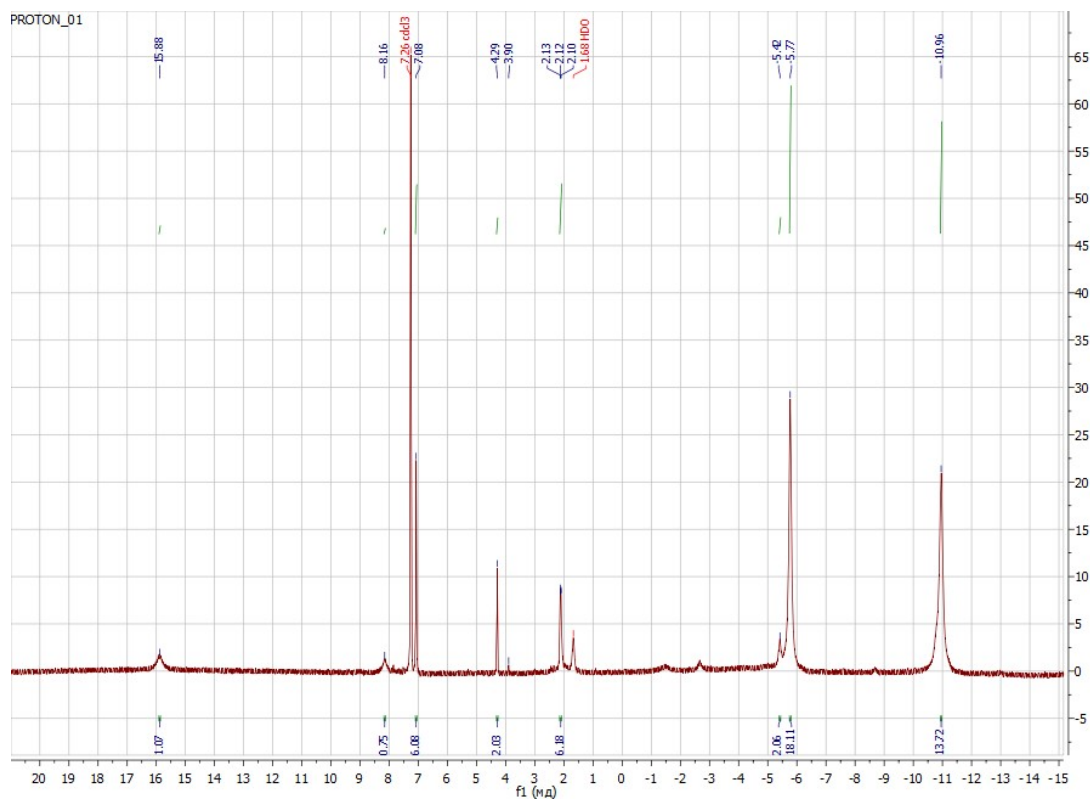

Figure S119.  $^1\text{H}$ - NMR spectrum of  $[\text{Tb}(\text{PFDMB})_3\text{Phen}]$  in  $\text{CDCl}_3$

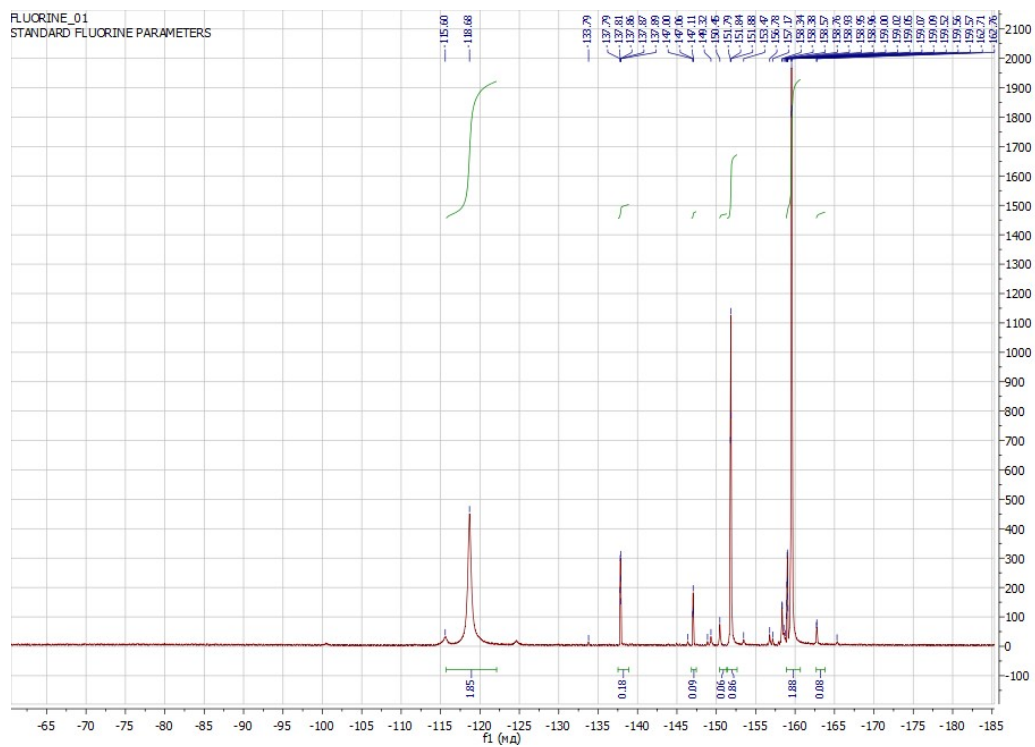

Figure S120.  $^{19}\text{F}$ - NMR spectrum of  $[\text{Tb}(\text{PFDMB})_3\text{Phen}]$  in  $\text{CDCl}_3$

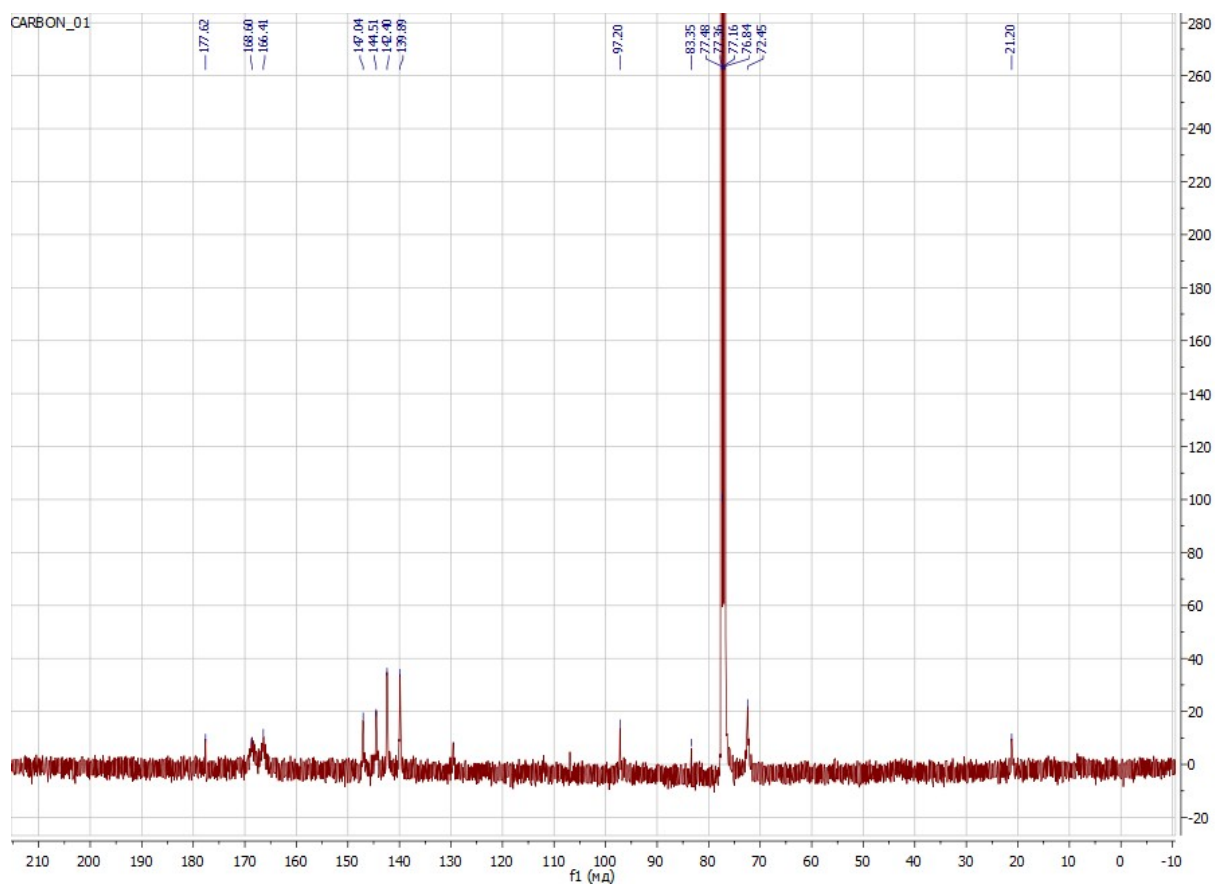

Figure S121.  $^{13}\text{C}$ - NMR spectrum of  $[\text{Tb}(\text{PFDMB})_3\text{Phen}]$  in  $\text{CDCl}_3$

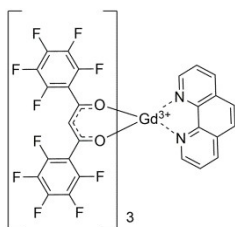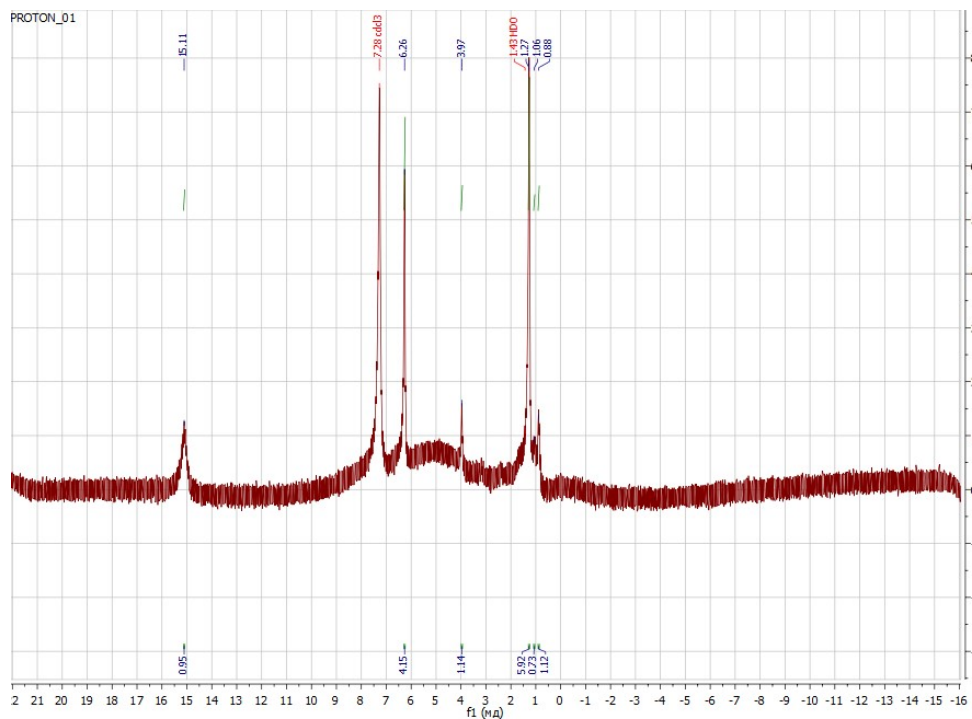

Figure SI22.  $^1\text{H}$ - NMR spectrum of  $[\text{Gd}(\text{PFDMB})_3\text{Phen}]$  in  $\text{CDCl}_3$

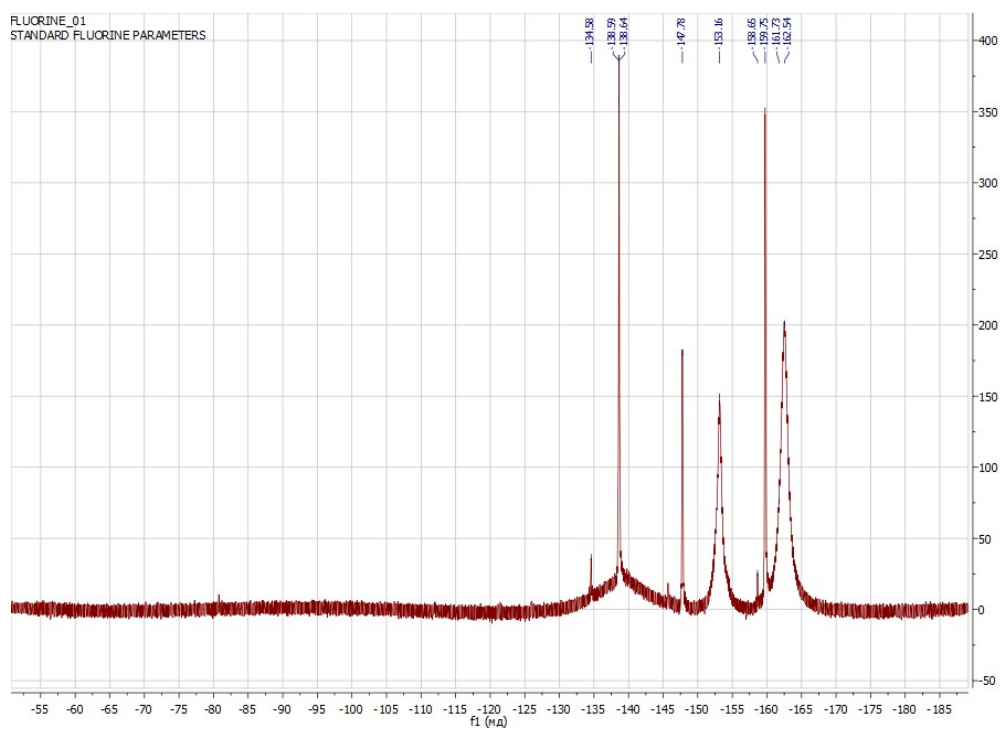

Figure SI23.  $^{19}\text{F}$ - NMR spectrum of  $[\text{Gd}(\text{PFDMB})_3\text{Phen}]$  in  $\text{CDCl}_3$

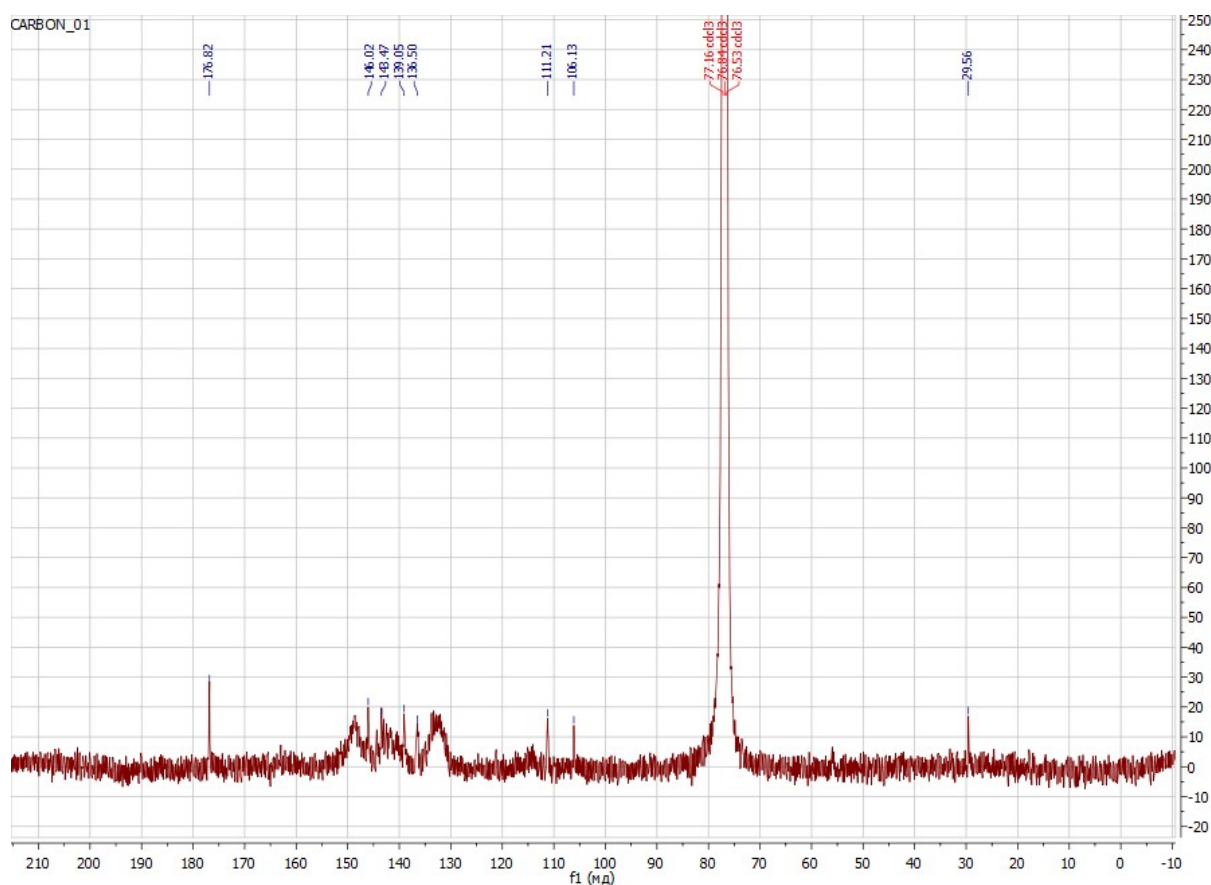

**Figure SI24.**  $^{13}\text{C}$ - NMR spectrum of  $[\text{Gd}(\text{PFDMB})_3\text{Phen}]$  in  $\text{CDCl}_3$

## References

1. Freidzon AYa, Scherbinin AV, Bagaturyants AA, Alfimov MV. Ab Initio Study of Phosphorescent Emitters Based on Rare-Earth Complexes with Organic Ligands for Organic Electroluminescent Devices. *J Phys Chem A*. 2011;115(18):4565-4573. doi:10.1021/jp111303a
2. Korshunov VM, Tsorieva AV, Gontcharenko VE, et al. Photophysical Properties of  $\text{Eu}^{3+}$   $\beta$ -Diketonates with Extended  $\pi$ -Conjugation in the Aromatic Moiety. *Inorganics*. 2022;11(1):15. doi:10.3390/inorganics11010015
3. Hasegawa Y, Kitagawa Y, Shoji S. Energy Transfer of Lanthanide Coordination Compounds. In: *Lanthanide-Based Wavelength Conversion Materials*. Springer Nature Singapore; 2024:71-118. doi:10.1007/978-981-97-5636-0\_4
4. Hori A, Shinohe A, Takatani S, Miyamoto TK. Synthesis and Crystal Structures of Fluorinated  $\beta$ -Diketonate Metal ( $\text{Al}^{3+}$ ,  $\text{Co}^{2+}$ ,  $\text{Ni}^{2+}$ , and  $\text{Cu}^{2+}$ ) Complexes. *Bulletin of the Chemical Society of Japan*. 2009;82(1):96-98. doi:10.1246/bcsj.82.96
5. Kusakawa T, Sakai S, Nakajima K, Yuge H, Rzeznicka II, Hori A. Synthesis, Structures and Co-Crystallizations of Perfluorophenyl Substituted  $\beta$ -Diketone and Triketone Compounds. *Crystals*. 2019;9(3):175. doi:10.3390/cryst9030175
